# Supplementary material for: Dynein Heavy Chain, Encoded by Two Genes in Agaricomycetes, Is Required for Nuclear Migration in Schizophyllum commune
Source: PubMed Central journal article supplement (PMC4540427; doi:10.1371/journal.pone.0135616), 2015-08-18
Supplement: pone.0135616.s001.pdf [file pone.0135616.s001.pdf]

# S1 File

**Supplementary Table A. Data sources for phylogenetic analyses**, accessed December 2011. Representatives of Agaricomycotina are indicated as classes; for Wallemiomycetes, no subphylum is assigned.

| species                                                    | phylum        | subphylum/class    | database        | accession number(s)                         |
|------------------------------------------------------------|---------------|--------------------|-----------------|---------------------------------------------|
| <i>Agaricus bisporus</i> var <i>bisporus</i> H97           | Basidiomycota | Agaricomycetes     | JGI             | 188324<br>214780                            |
| <i>Agaricus bisporus</i> var <i>burnetti</i> JB137-S8      | Basidiomycota | Agaricomycetes     | JGI             | 80770<br>50984                              |
| <i>Ashbya gossypii</i>                                     | Ascomycota    | Saccharomycotina   | NCBI            | NP983660                                    |
| <i>Aspergillus fumigatus</i>                               | Ascomycota    | Pezizomycotina     | NCBI            | XP753470                                    |
| <i>Aspergillus nidulans</i>                                | Ascomycota    | Pezizomycotina     | NCBI            | XP657722                                    |
| <i>Auricularia delicata</i> SS-5 v 1.0                     | Basidiomycota | Agaricomycetes     | JGI             | 78165<br>179093                             |
| <i>Bjerkandera adusta</i> v 1.0                            | Basidiomycota | Agaricomycetes     | JGI             | 164640<br>210459                            |
| <i>Botryobasidium botryosum</i> _v 1.0                     | Basidiomycota | Agaricomycetes     | JGI             | 26434<br>26427                              |
| <i>Candida albicans</i>                                    | Ascomycota    | Saccharomycotina   | NCBI            | XP723061                                    |
| <i>Coniophora puteana</i> v 1.0                            | Basidiomycota | Agaricomycetes     | JGI             | 114255<br>133816                            |
| <i>Coprinopsis cinereus</i> Okayama 7#130                  | Basidiomycota | Agaricomycetes     | JGI             | 11129<br>3276                               |
| <i>Cryptococcus bacillosporus</i>                          | Basidiomycota | Tremellomycetes    | Broad Institute | CNBF3870                                    |
| <i>Cryptococcus gatti</i> WM276                            | Basidiomycota | Tremellomycetes    | NCBI            | XP003194894                                 |
| <i>Cryptococcus neoformans</i> var <i>neoformans</i> JEC21 | Basidiomycota | Tremellomycetes    | NCBI            | XP571532                                    |
| <i>Dacryopinax</i> sp. DJM 731 SSP-1 v 1.0                 | Basidiomycota | Dacryomycetes      | JGI             | 67652<br>116759                             |
| <i>Dichomitus squalens</i> v 1.0                           | Basidiomycota | Agaricomycetes     | JGI             | 172670<br>182524                            |
| <i>Fomitiporia mediterranea</i> v 1.0                      | Basidiomycota | Agaricomycetes     | JGI             | 106792<br>121816                            |
| <i>Fomitopsis pinicola</i> SS1 v 1.0                       | Basidiomycota | Agaricomycetes     | JGI             | 140971<br>150781                            |
| <i>Ganoderma</i> sp 10597 SS1 v 1.0                        | Basidiomycota | Agaricomycetes     | JGI             | 113078<br>140853                            |
| <i>Gloeophyllum trabeum</i> v 1.0                          | Basidiomycota | Agaricomycetes     | JGI             | 69644<br>135602                             |
| <i>Gymnopus luxurians</i> v 1.0                            | Basidiomycota | Agaricomycetes     | JGI             | 961840<br>234850                            |
| <i>Heterobasidion annosum</i> v 2.0                        | Basidiomycota | Agaricomycetes     | JGI             | 157884<br>167275                            |
| <i>Homo sapiens</i>                                        | Mammalia      | Hominidae          | NCBI            | NP001267                                    |
| <i>Hypholoma sublateralitium</i> v 1.0                     | Basidiomycota | Agaricomycetes     | JGI             | 42741<br>509615                             |
| <i>Jaapia argyllacea</i> v 1.0                             | Basidiomycota | Agaricomycetes     | JGI             | 140422<br>37924                             |
| <i>Laccaria bicolor</i> v 2.0                              | Basidiomycota | Agaricomycetes     | JGI             | 385191<br>300914                            |
| <i>Magnaporthe oryzae</i> 70 50                            | Ascomycota    | Pezizomycotina     | NCBI            | EDK04833                                    |
| <i>Malassezia globosa</i>                                  | Basidiomycota | Ustilaginomycotina | JGI             | 1036<br>1033                                |
| <i>Melampsora laricis populina</i> v 1.0                   | Basidiomycota | Pucciniomycotina   | JGI             | 46877                                       |
| <i>Moniliophthora perniciosa</i>                           | Basidiomycota | Agaricomycetes     |                 | (personal communication J. Mondego, Brazil) |
| <i>Mucor circinelloides</i>                                | Mucoromycota  | Mucoromycotina     | JGI             | 90435                                       |
| <i>Mus musculus</i>                                        | Mammalia      | Rodentia           | NCBI            | NP084514                                    |
| <i>Nectria haematococca</i>                                | Ascomycota    | Pezizomycotina     | NCBI            | EEU40393                                    |
| <i>Neurospora crassa</i>                                   | Ascomycota    | Pezizomycotina     | NCBI            | XP962616                                    |
| <i>Paxillus involutus</i> ATCC                             | Basidiomycota | Agaricomycetes     | JGI             | 169564                                      |

|                                                                 |               |                    |                 |                          |
|-----------------------------------------------------------------|---------------|--------------------|-----------------|--------------------------|
| 200175                                                          |               |                    |                 | 5609                     |
| <i>Phanerochaete carnosae</i><br>HHB-10118-Sp v 1.0             | Basidiomycota | Agaricomycetes     | JGI             | 256688<br>168059         |
| <i>Phanerochaete chrysosporium</i> v. 2.0                       | Basidiomycota | Agaricomycetes     | JGI             | 7743<br>7621             |
| <i>Phlebia brevispora</i> HHB-7030 SS6 v 1.0                    | Basidiomycota | Agaricomycetes     | JGI             | 77449<br>138126          |
| <i>Phlebiopsis gigantea</i> v 1.0                               | Basidiomycota | Agaricomycetes     | JGI             | 34940<br>29508           |
| <i>Pichia pastoris</i> GS115                                    | Ascomycota    | Saccharomycotina   | NCBI            | XP002491674              |
| <i>Piriformospora indica</i>                                    | Basidiomycota | Agaricomycetes     | MIPS            | PIIN_08066<br>PIIN_03421 |
| <i>Pleurotus ostreatus</i> PC9 v 1.0                            | Basidiomycota | Agaricomycetes     | JGI             | 90323<br>85298           |
| <i>Pleurotus ostreatus</i> PC15 v 2.0                           | Basidiomycota | Agaricomycetes     | JGI             | 1074656<br>49217         |
| <i>Puccinia graminis</i> f sp <i>tritici</i><br>CRL 75 36 700 3 | Basidiomycota | Pucciniomycotina   | NCBI            | XP0033294                |
| <i>Punctularia strigosozonata</i> v 1.0                         | Basidiomycota | Agaricomycetes     | JGI             | 109520<br>139986         |
| <i>Rhizopus oryzae</i> RA 99 880                                | Mucoromycota  | Mucoromycotina     | Broad Institute | RO3G06230                |
| <i>Rhodotorula glutinis</i>                                     | Basidiomycota | Pucciniomycotina   | NCBI            | EGU12573                 |
| <i>Rhodotorula graminis</i> strain<br>WP1 v 1.0                 | Basidiomycota | Pucciniomycotina   | JGI             | 34525                    |
| <i>Saccharomyces cerevisiae</i>                                 | Ascomycota    | Saccharomycotina   | NCBI            | EDN59957                 |
| <i>Schizophyllum commune</i> v 1.0                              | Basidiomycota | Agaricomycetes     | JGI             | 65157<br>65089           |
| <i>Schizosaccharomyces pombe</i> 972h                           | Ascomycota    | Taphrinomycotina   | NCBI            | XP001713108              |
| <i>Serpula lacrymans</i> S7 3 v 2.0                             | Basidiomycota | Agaricomycetes     | JGI             | 97057<br>158538          |
| <i>Serpula lacrymans</i> S7 9 v 1.0                             | Basidiomycota | Agaricomycetes     | JGI             | 358531<br>445906         |
| <i>Sporisorium reilianum</i>                                    | Basidiomycota | Ustilaginomycotina | MIPS            | sr13295<br>sr15257       |
| <i>Sporobolomyces roseus</i> v 1.0                              | Basidiomycota | Pucciniomycotina   | JGI             | 21679                    |
| <i>Stereum hirsutum</i> FP- 91666<br>SS1 v 1.0                  | Basidiomycota | Agaricomycetes     | JGI             | 143406<br>151431         |
| <i>Trametes versicolor</i> v 1.0                                | Basidiomycota | Agaricomycetes     | JGI             | 111059                   |
| <i>Tremella mesenterica</i> Fries v 1.0                         | Basidiomycota | Tremellomycetes    | JGI             | 62339                    |
| <i>Tuber melanosporum</i>                                       | Ascomycota    | Pezizomycotina     | INRA            | GSTUMT00000794001        |
| <i>Ustilago maydis</i>                                          | Basidiomycota | Ustilaginomycotina | NCBI            | AAK91759<br>AAK91760     |
| <i>Wallemia sebi</i> v 1.0                                      | Basidiomycota | Wallemiomycetes    | JGI             | 59093<br>67017           |
| <i>Wolfiporia cocos</i> MD-104<br>SS10 v 1.0                    | Basidiomycota | Agaricomycetes     | JGI             | 93003<br>159953          |

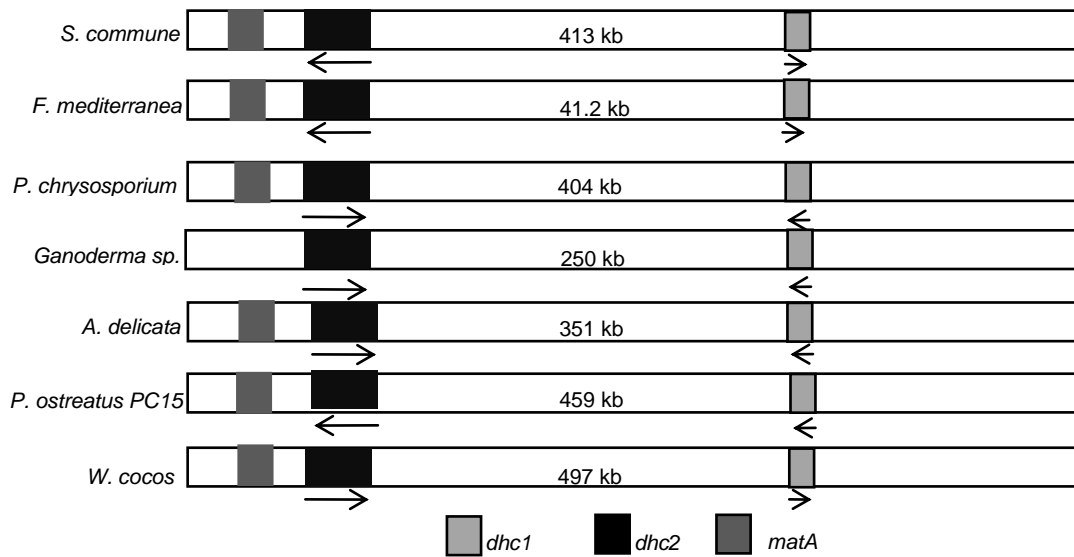

**Supplementary Fig. A. Conservation of genomic localization for *dhc1* and *dhc2* with respect to linkage to the mating type A locus in hymenomycetes.** *S. commune* as well as *Fomitiporia mediterranea*, *Phanerochaete chrysosporium*, *Ganoderma lucidum*, *Auricularia delicata*, *Pleurotus ostreatus* and *Wolfiporia cocos* are shown, data were retrieved from genome sequences in public databases.

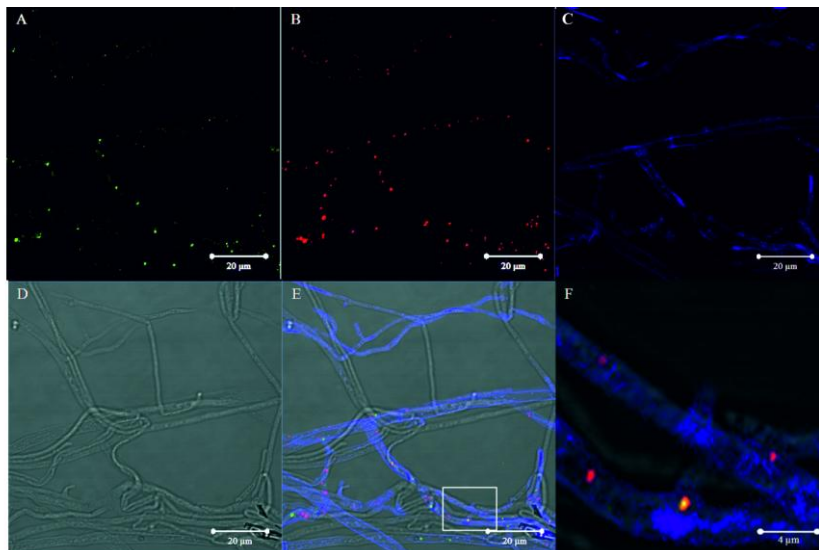

**Supplementary Fig. B. Immunofluorescence co-localization.** Dhc1 (A, FITC labeled in green) and Dhc2 (B, Rhodamin labeled in red), combined with nuclear stain (C, DAPI stain in blue) and micrograph (D), superimposed picture (E) and enlarged view indicated in E (F).

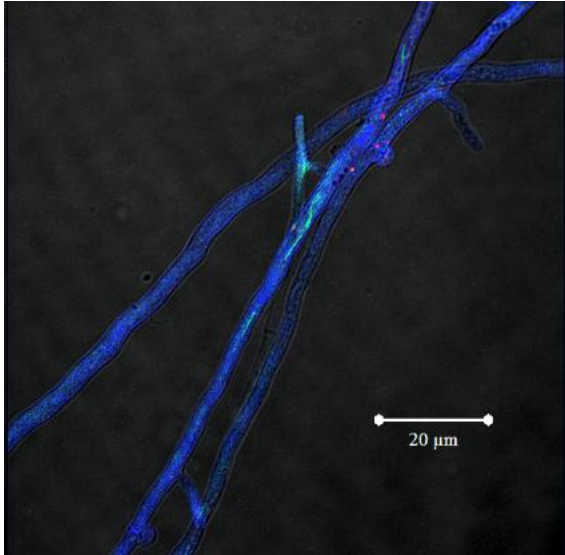

**Supplementary Fig. C. Dhc1 aggregation to be independent from microtubules in accordance with a storage independent from Dhc2. Microtubule (in green), Dhc1 (in red) and DNA staining (in blue).**

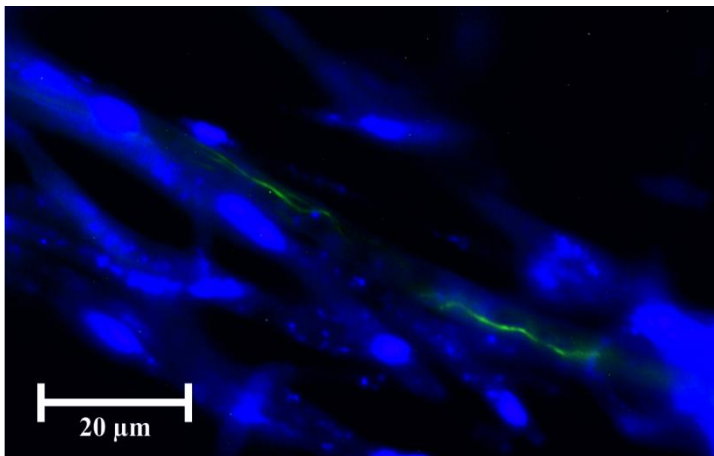

**Supplementary Fig. D. No obvious alterations of the microtubular cytoskeleton is visible. Microtubule (in green) and DNA staining (in blue) in a  $\Delta dhc2$  mutant.**
